# Supplementary material for: Mendelian randomization of circulating proteome identifies actionable targets in heart failure
Source: PubMed Central journal article supplement (PMC9375407; doi:10.1186/s12864-022-08811-2), 2022-08-13

## **Supplementary Material**

Figure S1.

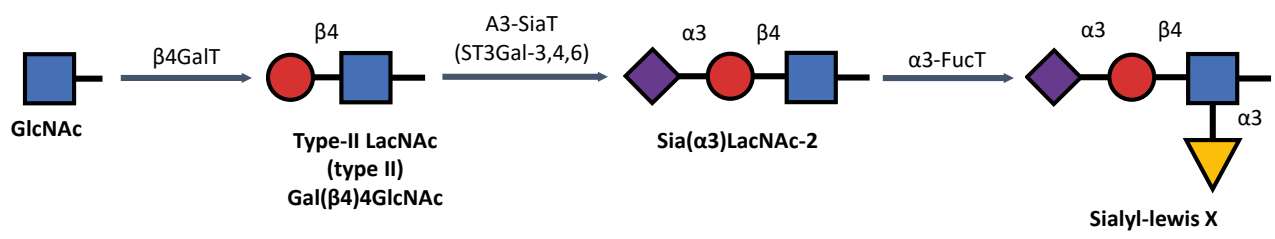

Figure S2.

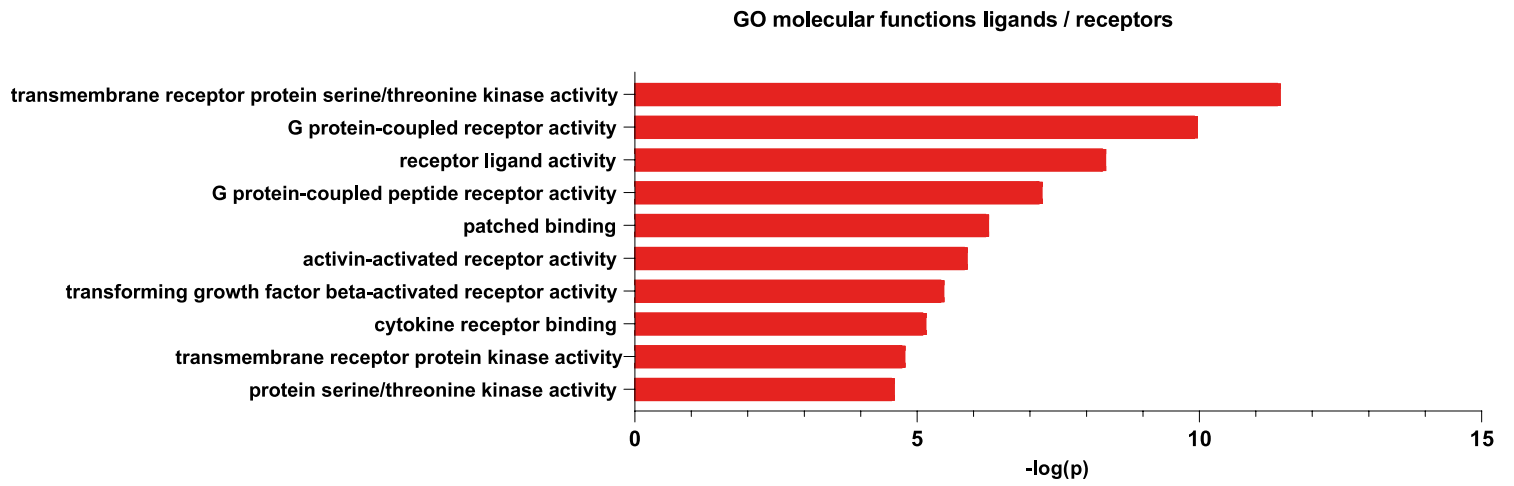

Supplement: 12864_2022_8811_MOESM1_ESM.pdf [file 12864_2022_8811_MOESM1_ESM.pdf]
